# Supplementary material for: Neodymium isotope ratio measurements by LC-MC-ICPMS for nuclear applications: investigation of isotopic fractionation and mass bias correction
Source: Royal Society of Chemistry journal article supplement (doi:10.1039/c4ja00361f), 2014-12-08
Supplement: c4ja00361f1.pdf [file c4ja00361f1.pdf]

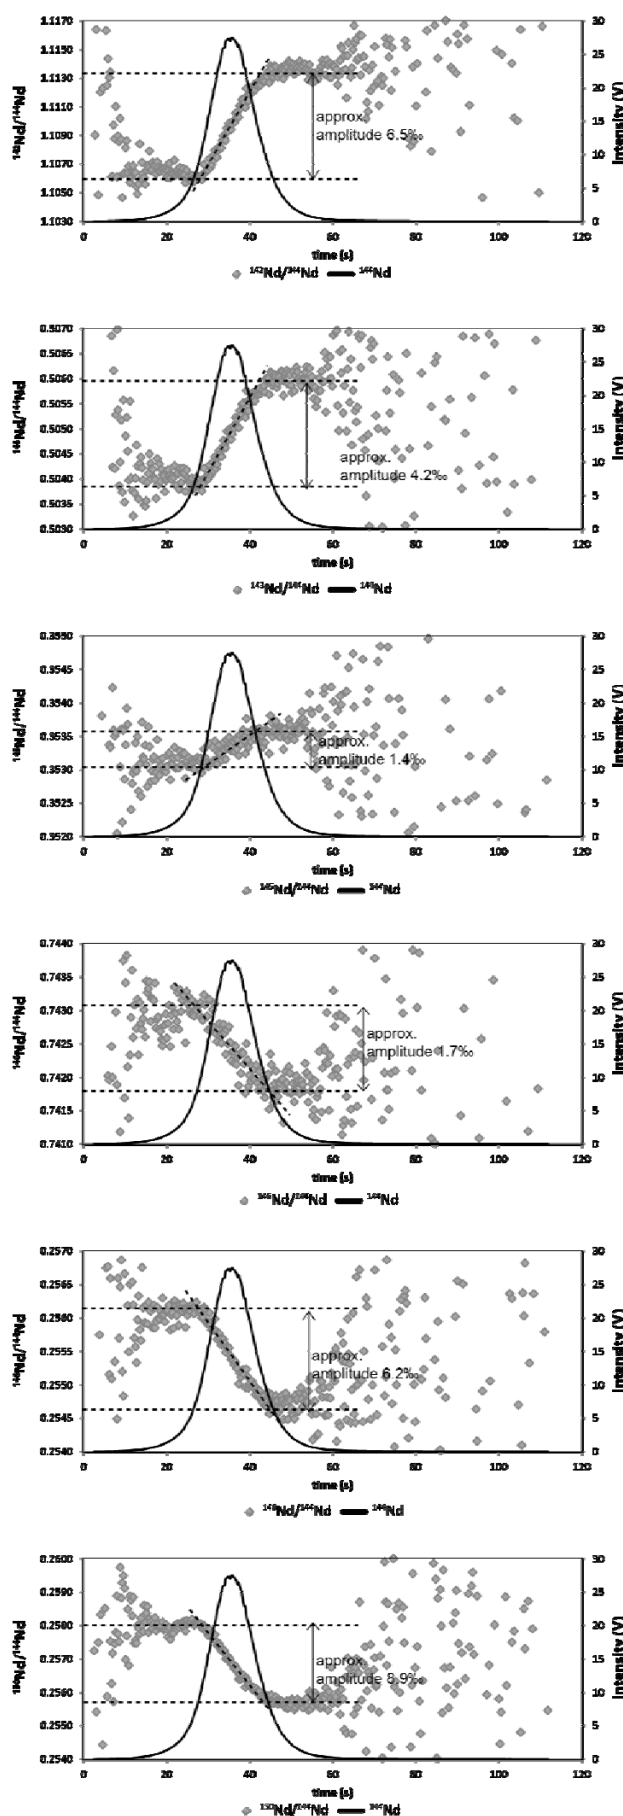

Figure S1: Elution profile of the  $^{144}\text{Nd}$  signal (JNdi-1 standard solution) by LC-MC-ICPMS in gradient mode (integration time 0.262 s) and uncorrected  $^{14x}\text{Nd}/^{144}\text{Nd}$  isotope ratios across the transient signals. The approximate amplitude of the drift was estimated by the variation of isotope ratios between the two horizontal lines.

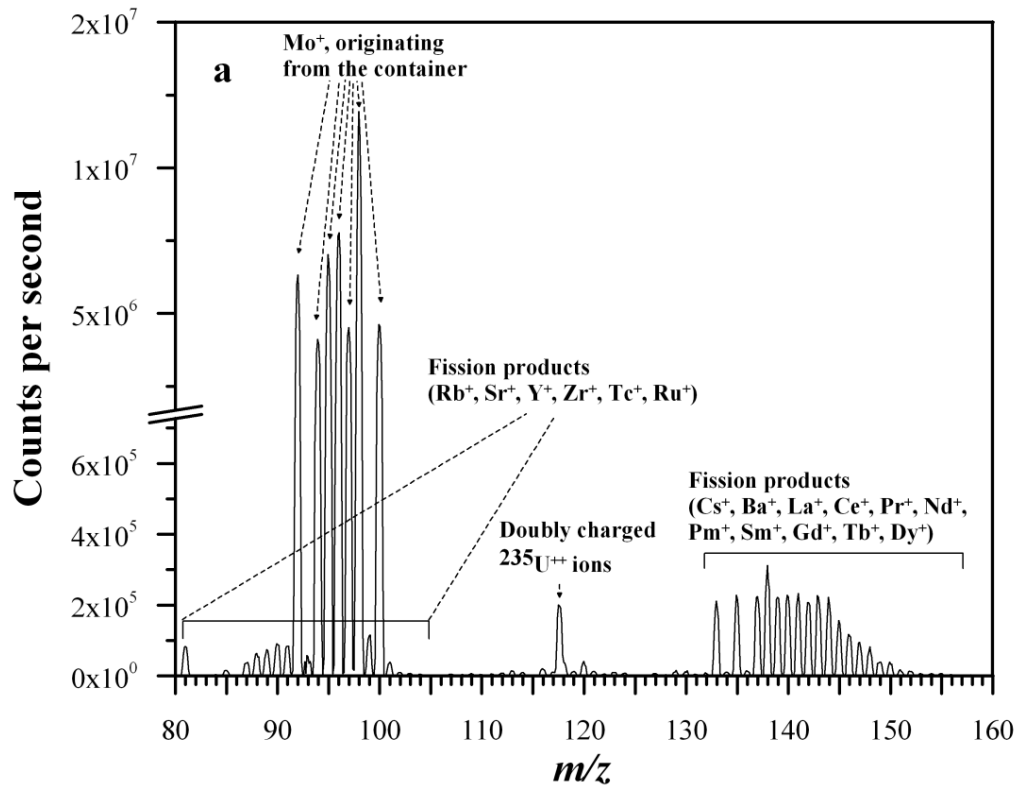

Figure S2: Mass spectrum by Q-ICP-MS of the <sup>235</sup>U target sample between 80 and 160 amu. Mo is a fission product element but its presence was essentially due to the 2% of Mo present in the steel container incorporating the <sup>235</sup>U target.
